# Supplementary material
Source: HighWire-hosted journal article supplement (https://heart.bmj.com/content/106/5/358)
Supplement: inline-supplementary-material-1 [file inline-supplementary-material-1.pdf]

**eAppendix 1.** Analysis strategy to evaluate, in patients treated with DOACs, the proportion of patients eligible for dose adjustment during follow-up, and of these, the proportion of patients who received a reduction in dose

- Identify patients whose renal function declines enough to meet the dose adjustment criteria and provide the frequency and percentage of patients meeting the criteria by DOAC type and overall:
  - **Dabigatran:** CrCl from >30 at baseline to ≤30 at any follow-up time
  - **Rivaroxaban:** CrCl from >50 at baseline to ≤50 at any follow-up time
  - **Edoxaban:** CrCl from >50 at baseline to ≤50 at any follow-up time
  - **Apixaban:** Serum creatinine from ≤1.5 at baseline to >1.5 at any follow-up time.
- In above identified patients, evaluate whether the dose of DOACs are appropriately reduced or not and provide the frequency and percentage of patients based on the below criteria:
  - **Dabigatran**
    - 150 mg twice daily is standard dose.
    - CrCl 15 to 30 mL/min: 75 mg twice daily unless patient receiving concomitant dronedarone, then avoid concurrent use.
    - CrCl <15 mL/min or on dialysis: not recommended.
  - **Rivaroxaban**
    - 20 mg once daily is standard dose.
    - CrCl 15 to 50 mL/min: 15 mg once daily.
    - CrCl <15 mL/min or on dialysis: Avoid use.
  - **Edoxaban**
    - 60 mg once daily is standard dose.
    - CrCl 15 to 50 mL/min: 30 mg once daily.
    - CrCl <15 mL/min or on dialysis: Avoid use.
    - CrCl >95 mL/min: Avoid use.
  - **Apixaban**
    - 5 mg twice daily unless patient has any 2 of the following: Age ≥80 years, body weight ≤60 kg, or serum creatinine >1.5 mg/dL, then reduce dose to 2.5 mg twice daily.
  - **Note** – Patients who are taken off drug because CrCl creatinine decreases below the threshold in which the drug is recommended are considered appropriately dosed.

**eFigure 1.** Cohort creation for the specific aim evaluating, in patients treated with DOACs, the proportion of patients eligible for dose adjustment during follow-up, and of these, the proportion of patients who received a reduction in dose

Abbreviation: AF, atrial fibrillation; OAC, oral anticoagulants; CrCl, creatinine clearance; DOACs, direct oral anticoagulants

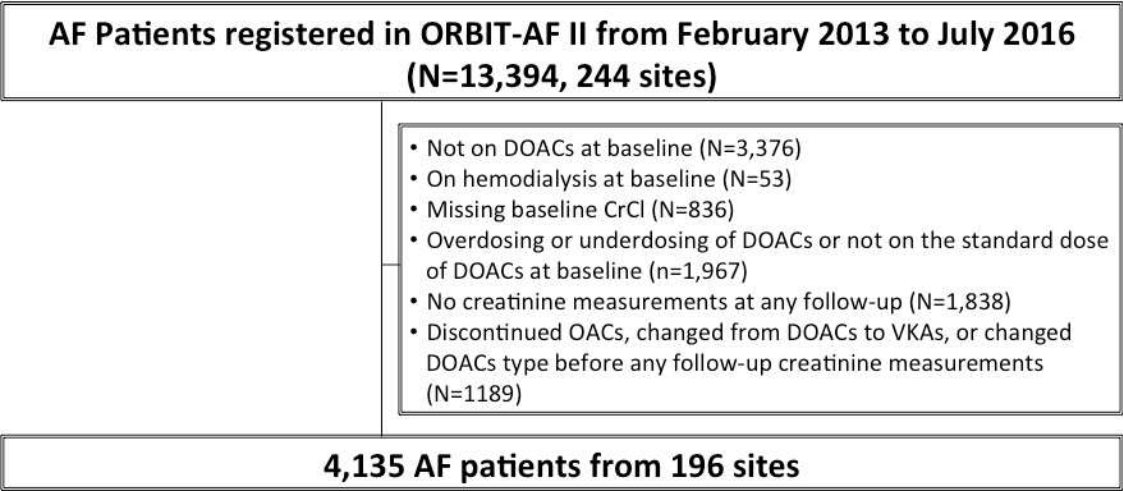

**eTable 1.** Numbers of patients who were censored at each time-point

|                  | <b>No of<br/>patients</b> | <b>Percent</b> | <b>Cumulative<br/>Frequency</b> | <b>Cumulative<br/>Percent</b> |
|------------------|---------------------------|----------------|---------------------------------|-------------------------------|
| <b>6 months</b>  | 279                       | 4.2%           | 279                             | 4.2%                          |
| <b>12 months</b> | 3519                      | 52.7%          | 3798                            | 56.8%                         |
| <b>18 months</b> | 1162                      | 17.4%          | 4960                            | 74.2%                         |
| <b>24 months</b> | 1722                      | 25.8%          | 6682                            | 100.0%                        |

**eTable 2.** Numbers of patients who were defined as SRF and WRF at each time-point

|              | Visit at which patient was censored |           |           |           | Total |
|--------------|-------------------------------------|-----------|-----------|-----------|-------|
|              | 6 months                            | 12 months | 18 months | 24 months |       |
| <b>SRF</b>   | 235                                 | 2776      | 878       | 1250      | 5139  |
|              | 84.2%                               | 78.9%     | 75.6%     | 72.6%     |       |
| <b>WRF</b>   | 44                                  | 743       | 284       | 472       | 1543  |
|              | 15.8%                               | 21.1%     | 24.4%     | 27.4%     |       |
| <b>Total</b> | 279                                 | 3519      | 1162      | 1722      | 6682  |

**Abbreviations:** SRF, stable renal function; WRF, worsening renal function

**eTable 3.** Comparison of baseline characteristics and provider specialty between patients with appropriately reduced NOACs and those without

|                                                           | Overall<br>N=145  | Not Appropriately<br>Reduced<br>N=116 | Appropriately<br>Reduced<br>N=29 |
|-----------------------------------------------------------|-------------------|---------------------------------------|----------------------------------|
| <b><u>Demographics</u></b>                                |                   |                                       |                                  |
| Age, median (IQR)                                         | 79.0 (75.0, 82.0) | 79.0 (74.5, 83.0)                     | 80.0 (77.0, 82.0)                |
| Male                                                      | 62 (42.8%)        | 48 (41.4%)                            | 14 (48.3%)                       |
| Race                                                      |                   |                                       |                                  |
| White                                                     | 127 (87.6%)       | 102 (87.9%)                           | 25 (86.2%)                       |
| Black/African American                                    | 7 (4.8%)          | 6 (5.2%)                              | 1 (3.4%)                         |
| Hispanic                                                  | 4 (2.8%)          | 3 (2.6%)                              | 1 (3.4%)                         |
| <b><u>Medical History</u></b>                             |                   |                                       |                                  |
| Current smoker                                            | 6 (4.1%)          | 5 (4.3%)                              | 1 (3.4%)                         |
| Former / recent smoker                                    | 64 (44.1%)        | 47 (40.5%)                            | 17 (58.6%)                       |
| Hypertension                                              | 127 (87.6%)       | 100 (86.2%)                           | 27 (93.1%)                       |
| Hyperlipidemia                                            | 109 (75.2%)       | 85 (73.3%)                            | 24 (82.8%)                       |
| Diabetes                                                  | 33 (22.8%)        | 26 (22.4%)                            | 7 (24.1%)                        |
| Chronic kidney disease                                    | 54 (37.2%)        | 36 (31.0%)                            | 18 (62.1%)                       |
| Gastrointestinal bleed                                    | 6 (4.1%)          | 6 (5.2%)                              | 0 (0.0%)                         |
| Congestive heart failure                                  | 43 (29.7%)        | 37 (31.9%)                            | 6 (20.7%)                        |
| Pacemaker                                                 | 14 (9.7%)         | 12 (10.3%)                            | 2 (6.9%)                         |
| Cerebrovascular disease                                   | 30 (20.7%)        | 20 (17.2%)                            | 10 (34.5%)                       |
| History of coronary artery disease                        | 57 (39.3%)        | 46 (39.7%)                            | 11 (37.9%)                       |
| Prior myocardial infarction                               | 20 (13.8%)        | 16 (13.8%)                            | 4 (13.8%)                        |
| <b><u>Risk Score</u></b>                                  |                   |                                       |                                  |
| CHA <sub>2</sub> DS <sub>2</sub> VASc score, median (IQR) | 4.0 (4.0, 5.0)    | 4.0 (4.0, 5.0)                        | 5.0 (4.0, 6.0)                   |
| ATRIA bleeding score, median (IQR)                        | 3.0 (3.0, 5.0)    | 3.0 (3.0, 6.0)                        | 3.0 (3.0, 4.0)                   |
| ORBIT bleeding score, median (IQR)                        | 2.0 (1.0, 3.0)    | 2.0 (1.0, 3.0)                        | 3.0 (2.0, 4.0)                   |

**Vital Signs and AF Status**

|                                        |                      |                      |                      |
|----------------------------------------|----------------------|----------------------|----------------------|
| BMI (kg/m <sup>2</sup> ), median (IQR) | 28.2 (24.8, 31.2)    | 28.4 (24.7, 31.3)    | 27.7 (25.1, 29.1)    |
| Heart rate (bpm), median (IQR)         | 72.0 (64.0, 86.0)    | 73.0 (62.0, 87.5)    | 72.0 (64.0, 79.0)    |
| SBP (mm Hg), median (IQR)              | 132.0 (120.0, 142.0) | 132.0 (120.0, 146.0) | 130.0 (122.0, 136.0) |
| DBP (mm Hg), median (IQR)              | 72.0 (66.0, 80.0)    | 72.0 (66.0, 80.0)    | 74.0 (68.0, 80.0)    |

**Echocardiographic Assessment**

|                                |                   |                   |                   |
|--------------------------------|-------------------|-------------------|-------------------|
| LVEF, median (IQR)             | 55.0 (50.0, 60.0) | 55.0 (50.0, 60.0) | 60.0 (50.0, 60.0) |
| LA diameter (cm), median (IQR) | 4.2 (3.7, 4.7)    | 4.2 (3.8, 4.6)    | 3.9 (3.3, 5.0)    |

**Laboratory Data**

|                                 |                   |                   |                   |
|---------------------------------|-------------------|-------------------|-------------------|
| sCr (mg/dL), median (IQR)       | 1.0 (0.8, 1.3)    | 0.9 (0.8, 1.2)    | 1.1 (1.0, 1.3)    |
| Hemoglobin (g/dL), median (IQR) | 12.7 (11.5, 14.1) | 12.6 (11.5, 14.0) | 13.3 (11.4, 14.6) |
| CrCl (ml/min), median (IQR)     | 59.0 (53.9, 69.6) | 59.8 (54.0, 71.9) | 55.7 (51.7, 59.2) |

**Type of AF**

|                                |            |            |            |
|--------------------------------|------------|------------|------------|
| First Detected / New Onset     | 56 (38.6%) | 45 (38.8%) | 11 (37.9%) |
| Paroxysmal Atrial Fibrillation | 47 (32.4%) | 33 (28.4%) | 14 (48.3%) |
| Persistent Atrial Fibrillation | 28 (19.3%) | 25 (21.6%) | 3 (10.3%)  |
| Permanent Atrial Fibrillation  | 14 (9.7%)  | 13 (11.2%) | 1 (3.4%)   |

**Provider Specialty**

|                                  |             |            |            |
|----------------------------------|-------------|------------|------------|
| Internal Medicine / Primary Care | 21 (14.5%)  | 17 (14.7%) | 4 (13.8%)  |
| Cardiology                       | 113 (77.9%) | 90 (77.6%) | 23 (79.3%) |
| Electrophysiology                | 41 (28.3%)  | 35 (30.2%) | 6 (20.7%)  |

**Region**

|           |            |            |            |
|-----------|------------|------------|------------|
| West      | 19 (13.1%) | 15 (12.9%) | 4 (13.8%)  |
| Northeast | 30 (20.7%) | 25 (21.6%) | 5 (17.2%)  |
| Midwest   | 24 (16.6%) | 17 (14.7%) | 7 (24.1%)  |
| South     | 72 (49.7%) | 59 (50.9%) | 13 (44.8%) |

---

**Abbreviations:** IQR, interquartile range; BMI, body mass index; SBP, systolic blood pressure; DBP, diastolic blood pressure; LVEF, left ventricular ejection fraction; LA, left atrium; serum Cr, serum creatinine; CrCl, creatinine clearance; AF, atrial fibrillation
